# Supplementary material
Source: HighWire-hosted journal article supplement (https://heart.bmj.com/content/106/14/1094)
Supplement: inline-supplementary-material-1 [file inline-supplementary-material-1.pdf]

**Supplementary appendix****Is percutaneous mitral commissurotomy better than surgical commissurotomy for  
rheumatic mitral stenosis? A systematic review and meta-analysis of randomized  
controlled trials**

Achintya D Singh<sup>1</sup>, Agrima Mian<sup>1#</sup>, Niveditha Devasenapathy<sup>2</sup>, Gordon H Guyatt<sup>3</sup>, Ganesan  
Karthikeyan<sup>4\*</sup>

### Search strategy

Search Date: 20 February 2018 (updated August 2018)

Database: Embase <1974 to 2018 February 16>, Ovid MEDLINE(R) Epub Ahead of Print, In-Process & Other Non-Indexed Citations, Ovid MEDLINE(R) Daily, Ovid MEDLINE and Versions(R) <1946 to February 14, 2018>

Search Strategy:

- 
- 1 randomized\*.mp. (1642974)
  - 2 percutaneous mitral [valvotomy.mp.](#) (127)
  - 3 balloon mitral [valvotomy.mp.](#) (507)
  - 4 balloon mitral [valvuloplasty.mp.](#) (1004)
  - 5 percutaneous mitral [valvuloplasty.mp.](#) (603)
  - 6 (PTMC or PBMV or BMV).mp. (3365)
  - 7 2 or 3 or 4 or 5 or 6 (4909)
  - 8 randomized\*.mp. (213515)
  - 9 1 or 8 (1722809)
  - 10 7 and 9 (154)
  - 11 closed mitral [valvotomy.mp.](#) (189)
  - 12 open mitral [valvotomy.mp.](#) (53)
  - 13 surgical mitral [valvotomy.mp.](#) (15)
  - 14 surgical mitral [commissurotomy.mp.](#) (72)
  - 15 11 or 12 or 13 or 14 (325)
  - 16 9 and 15 (12)
  - 17 10 or 16 (160)
-

**Supplement Figure 1: Mitral valve gradients following the procedures**

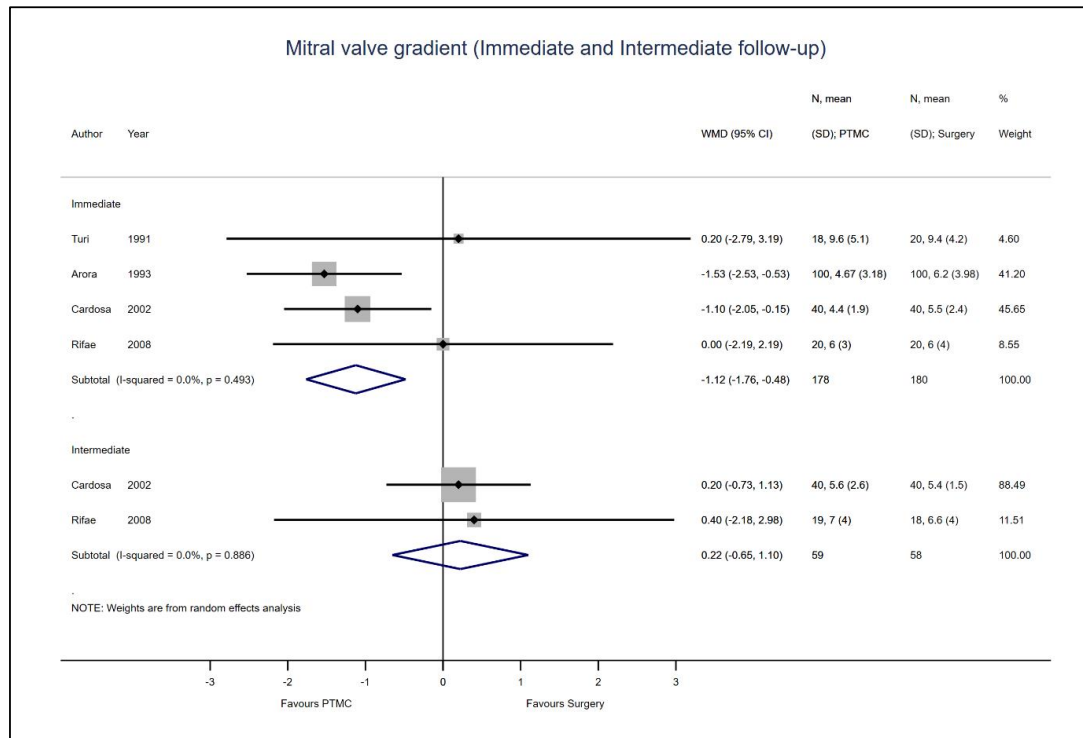

Supplement Figure 2: Mortality following the procedures

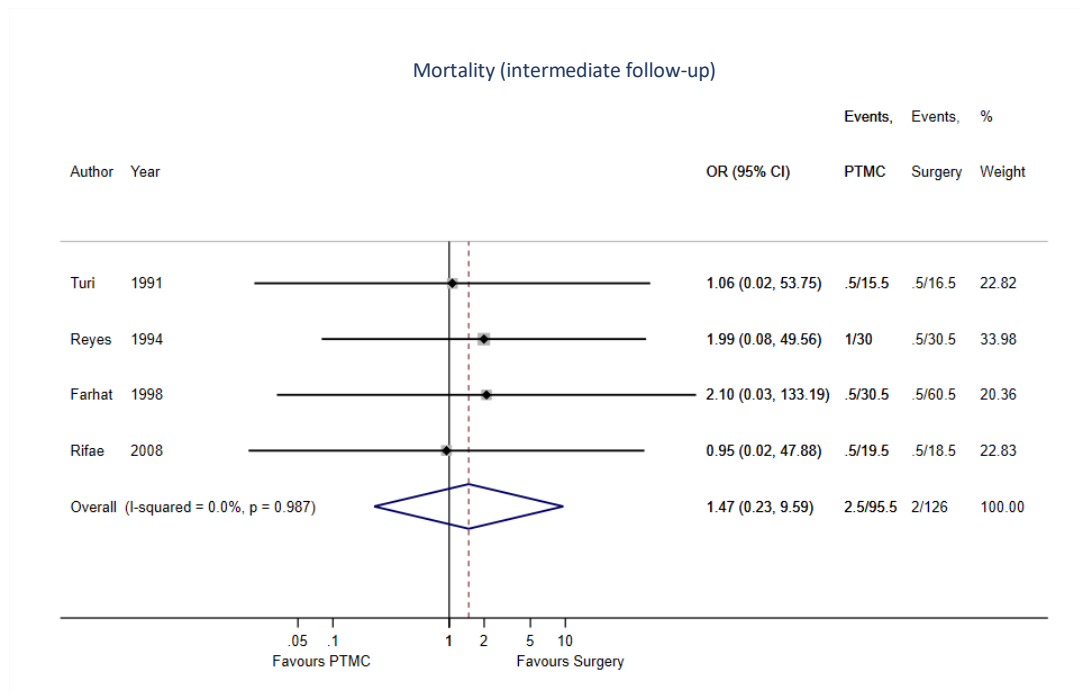

## Supplement Figure 3: Mitral valve area by method of assessment

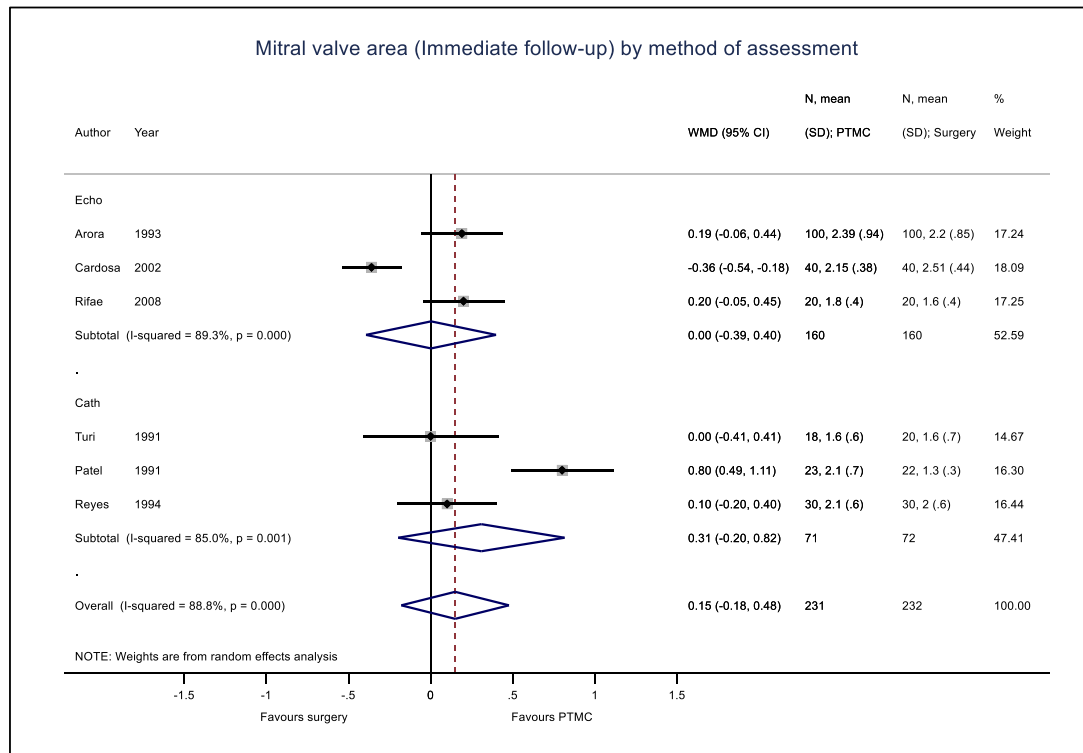

**Supplement Figure 4: Mitral valve area by the duration of follow-up**

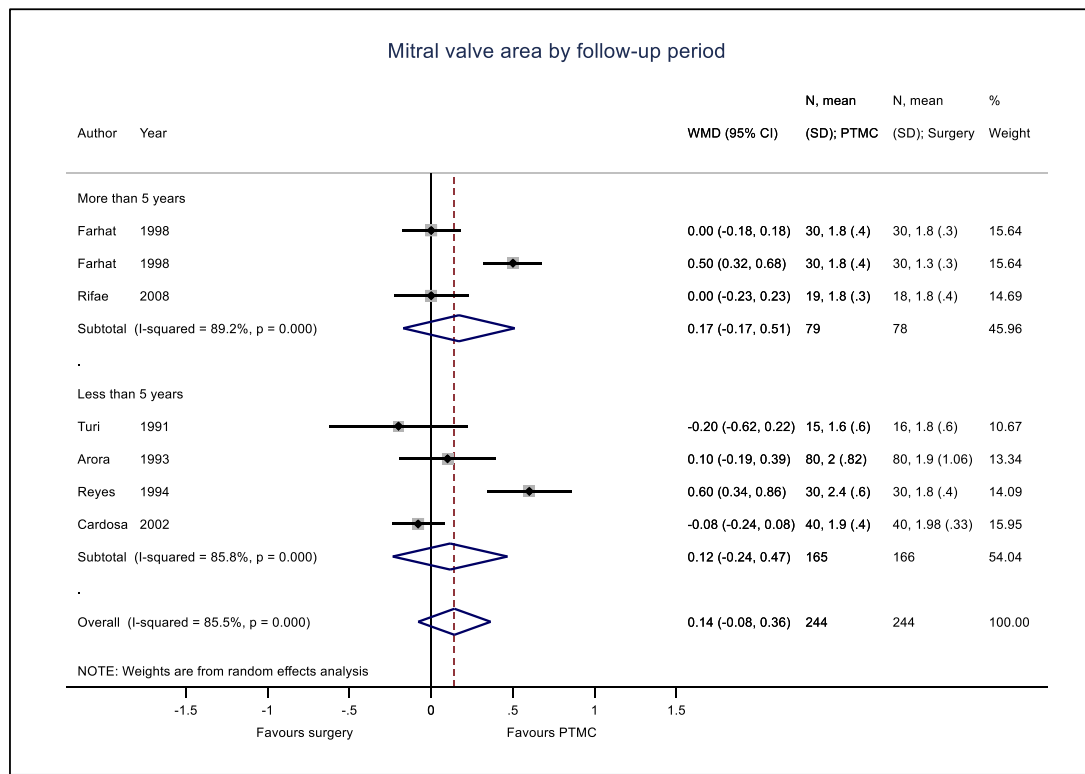

Supplement table 1: Risk of bias assessment

| Author, Publication year | Outcome                   | Randomization process | Deviations from intended interventions | Missing outcome data       | Measurement of the outcome* | Selection of the reported result | Overall Bias               |
|--------------------------|---------------------------|-----------------------|----------------------------------------|----------------------------|-----------------------------|----------------------------------|----------------------------|
| Rifaie,2008              | MVA/ MVG / MR             | Some concerns         | Low                                    | Low                        | Some concerns               | Low                              | Some concerns              |
|                          | Mortality/ Reintervention | Some concerns         | Low                                    | Low                        | Low                         | Low                              | Some concerns              |
| Turi, 1991               | MVA/MVG/ MR               | Low                   | Some concerns                          | Low                        | Low                         | Low                              | Some concerns              |
|                          | Mortality/ Reintervention | Low                   | Some concerns                          | Low                        | Low                         | Low                              | Low                        |
| Farhat1998               | MVA/MVG/ MR               | Low                   | Low                                    | Low                        | Low                         | Low                              | Low                        |
|                          | Mortality/ Reintervention | Low                   | Low                                    | Low                        | Low                         | Low                              | Low                        |
| Cardoso2002              | MVA/ MVG/MR               | Some concerns         | Low                                    | Some concerns <sup>†</sup> | Some concerns               | Low                              | Some concerns <sup>†</sup> |
|                          | Mortality/ Reintervention | Some concerns         | Low                                    | Some concerns              | Low                         | Low                              | Some concerns              |
| Patel 1991               | MVA/MVG/ MR               | Some concerns         | Low                                    | Low                        | Low                         | Low                              | Some concerns              |
|                          | Mortality                 | Some concerns         | Low                                    | Low                        | Low                         | Low                              | Low                        |
| Arora 1993               | MVA/MVG/MR                | Some concerns         | Low                                    | Low                        | Some concerns               | Low                              | Some concerns              |
|                          | Mortality/ Reintervention | Some concerns         | Low                                    | Some concerns <sup>‡</sup> | Low                         | Low                              | Some concerns              |
| Reyes 1994               | MVA/MVG/MR                | Some concerns         | Low                                    | Low                        | Low                         | Low                              | Some concerns              |
|                          | Mortality/ Reintervention | Some concerns         | Low                                    | Low                        | Low                         | Low                              | Some concerns              |

**Abbreviations:** MR- Mitral Regurgitation, MVA- Mitral valve area in cm<sup>2</sup>, MVG- Mitral Valve gradient in mmHg.

**Foot notes:** \* Unblinded studies using echocardiography for outcome assessment were considered to have some concerns regarding underlying bias. Mortality and the need for reinterventions would not be influenced by subjectivity of the outcomes assessors and were considered not to be associated with any concerns regarding assessment. †- No mention of loss to follow-up. Though the results indicate no loss to follow-up patients. ‡- Significant loss to follow-up patients (20% in each arm) led to some concerns of bias.

Supplement table 2: GRADE Evidence profile

| Certainty assessment                                                                                                                                                                      |                   |              |               |              |             |                      | No of patients                     |                         | Effect                 |                                                                                                                               | Certainty                     | Importance |
|-------------------------------------------------------------------------------------------------------------------------------------------------------------------------------------------|-------------------|--------------|---------------|--------------|-------------|----------------------|------------------------------------|-------------------------|------------------------|-------------------------------------------------------------------------------------------------------------------------------|-------------------------------|------------|
| No of studies                                                                                                                                                                             | Study design      | Risk of bias | Inconsistency | Indirectness | Imprecision | Other considerations | Percutaneous Mitral commissurotomy | Surgical commissurotomy | Relative (95% CI)      | Absolute Risk Difference (95% CI)                                                                                             |                               |            |
| <b>Symptoms and heart failure due to mitral stenosis as inferred from immediate post-procedure mitral valve area (MVA immediate), by echocardiography or cardiac catheterization</b>      |                   |              |               |              |             |                      |                                    |                         |                        |                                                                                                                               |                               |            |
| 6                                                                                                                                                                                         | randomised trials | not serious  | serious       | serious      | serious     | none                 | 231                                | 232                     | -                      | The mean immediate Mitral Valve Area (cm <sup>2</sup> ) in the intervention group was 0.15 higher (0.18 lower to 0.48 higher) | ⊕○○○<br>VERY LOW <sup>a</sup> | CRITICAL   |
| <b>Symptoms and heart failure due to mitral stenosis as inferred from mitral valve area (MVA intermediate term) at 30 months, by echocardiography or cardiac catheterization</b>          |                   |              |               |              |             |                      |                                    |                         |                        |                                                                                                                               |                               |            |
| 6                                                                                                                                                                                         | randomised trials | not serious  | serious       | serious      | serious     | none                 | 214                                | 244                     | -                      | The mean intermediate term- Mitral Valve Area (cm <sup>2</sup> ) was 0.13 higher with PTMC (0.09 lower to 0.35 higher)        | ⊕○○○<br>VERY LOW <sup>a</sup> | CRITICAL   |
| <b>Severe Mitral Regurgitation Immediately after the procedure (Severe MR-immediate), by echocardiography or cardiac catheterization</b>                                                  |                   |              |               |              |             |                      |                                    |                         |                        |                                                                                                                               |                               |            |
| 5                                                                                                                                                                                         | randomised trials | not serious  | not serious   | not serious  | serious     | none                 | 5/121 (4.1%)                       | 2/152 (1.3%)            | RR 2.12 (0.50 to 8.92) | 3 per 100 more with PTMC (Fewer than 1 per 100 to 10 more per 100)                                                            | ⊕⊕⊕○<br>MODERATE <sup>b</sup> | CRITICAL   |
| <b>Residual symptoms as inferred from the presence of non-severe mitral regurgitation immediately after the procedure (MR- Immediate), by echocardiography or cardiac catheterization</b> |                   |              |               |              |             |                      |                                    |                         |                        |                                                                                                                               |                               |            |
| 6                                                                                                                                                                                         | randomised trials | not serious  | not serious   | serious      | Serious     | None                 | 35/221 (15.8%)                     | 36/252 (14.3%)          | RR 1.16 (0.75 to 1.81) | 2 per 100 more with PTMC (Fewer than 4 per 100 to 12 more per 100)                                                            | ⊕⊕○○<br>LOW <sup>c</sup>      | IMPORTANT  |
| <b>Residual symptoms as inferred from the presence of non-severe mitral regurgitation at 30 months follow-up (MR: intermediate term), by echocardiography or cardiac catheterization</b>  |                   |              |               |              |             |                      |                                    |                         |                        |                                                                                                                               |                               |            |
| 3                                                                                                                                                                                         | randomised trials | not serious  | not serious   | serious      | serious     | none                 | 5/79 (6.3%)                        | 10/108 (9.3%)           | RR 0.83 (0.29 to 2.34) | 3 per 100 fewer with PTMC (Fewer than per 100 to 12 more per 100)                                                             | ⊕⊕○○<br>LOW <sup>c</sup>      | IMPORTANT  |
| <b>Symptoms and heart failure due to mitral stenosis as inferred from mitral restenosis (Restenosis), by echocardiography or cardiac catheterization</b>                                  |                   |              |               |              |             |                      |                                    |                         |                        |                                                                                                                               |                               |            |



|                                                 |                   |             |             |             |         |      |               |                |                                  |                                                                                |                               |           |
|-------------------------------------------------|-------------------|-------------|-------------|-------------|---------|------|---------------|----------------|----------------------------------|--------------------------------------------------------------------------------|-------------------------------|-----------|
| 3                                               | randomised trials | not serious | not serious | serious     | serious | none | 10/79 (12.7%) | 22/108 (20.4%) | <b>RR 0.66</b><br>(0.32 to 1.37) | <b>8 per 100 fewer with PTMC</b><br>(Fewer than 14 per 100 to 8 more per 100)  | ⊕⊕○○<br>LOW <sup>c</sup>      | IMPORTANT |
| <b>Mitral Re-intervention (Re-intervention)</b> |                   |             |             |             |         |      |               |                |                                  |                                                                                |                               |           |
| 2                                               | randomised trials | not serious | not serious | not serious | serious | none | 5/60 (8.3%)   | 21/90 (23.3%)  | <b>RR 0.42</b><br>(0.13 to 1.34) | <b>15 per 100 fewer with PTMC</b><br>(Fewer than 20 per 100 to 8 more per 100) | ⊕⊕⊕○<br>MODERATE <sup>d</sup> | CRITICAL  |

- a. Rated down for serious imprecision considering the wide confidence interval which overlaps no effect and fails to rule out important benefit or harm; for serious inconsistency due to the high statistical heterogeneity ( $I^2 > 50\%$ ), and for indirectness as MVA is a surrogate marker for improvement in symptoms and heart failure.
- b. Rated down for serious imprecision considering the wide confidence interval which overlaps no effect..
- c. Rated down for serious imprecision as the wide confidence interval fails to rule out important benefits or harm, and for indirectness as MR is a surrogate for lack of improvement or worsening of symptoms and heart failure
- d. Rated down for serious imprecision as the wide confidence interval fails to rule out important benefits or harm
